# Supplementary material for: Seasonal trends in antidepressant prescribing, depression, anxiety and self-harm in adolescents and young adults: an open cohort study using English primary care data
Source: HighWire-hosted journal article supplement (doi:10.1136/bmjment-2023-300855), 2023-10-01
Supplement: bmjment-2023-300855supp001_data_supplement.pdf [file bmjment-2023-300855supp001_data_supplement.pdf]

Supplementary Fig 1 Incidence rates for citalopram, sertraline, and fluoxetine per 1000 person-years and incidence rate ratios for each month, by age and sex, England, 2006-2019. Incidence rate ratios for each month compared to January and adjusted for year, region, deprivation, ethnic group and working days

**Citalopram**

Incidence rates

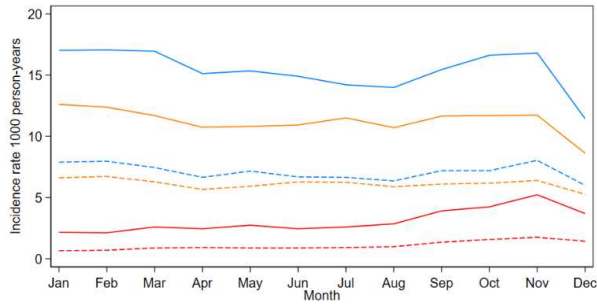

Incidence rate ratios

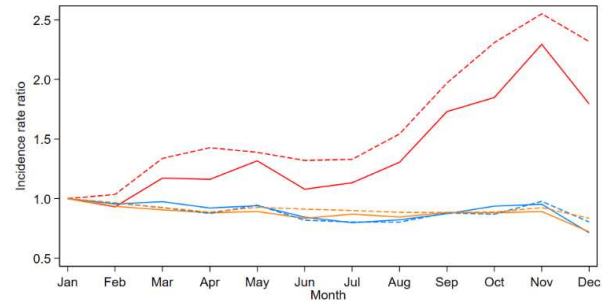

**Sertraline**

Incidence rates

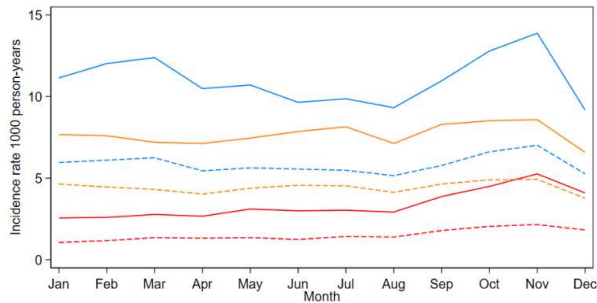

Incidence rate ratios

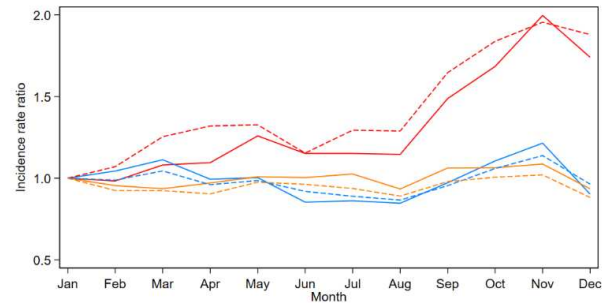

**Fluoxetine**

Incidence rates

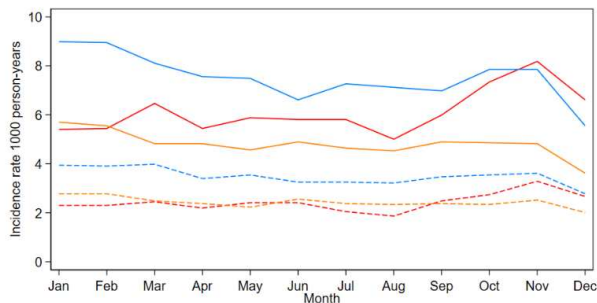

Incidence rate ratios

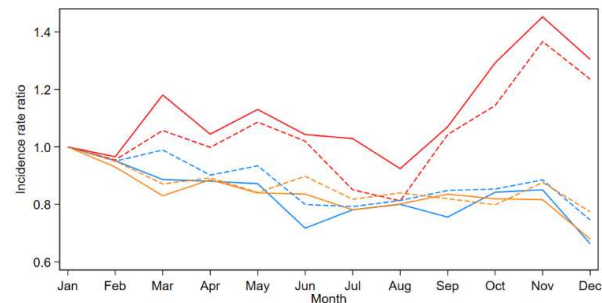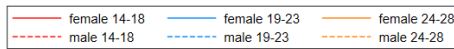

Supplementary Table 1: Female incidence rate ratios, 95% confidence intervals (CI) and p values for SSRI, depression, anxiety and self-harm adjusted for year, region, deprivation, ethnic group and working days, for each month, by age group, England, 2006-2019

|                           | 14-18 years |             |        | 19-23 years |             |        | 24-28 years |             |        |
|---------------------------|-------------|-------------|--------|-------------|-------------|--------|-------------|-------------|--------|
|                           | IRR         | (95% CI)    | p      | IRR         | (95% CI)    | p      | IRR         | (95% CI)    | p      |
| <b>SSRI prescriptions</b> |             |             |        |             |             |        |             |             |        |
| Jan                       | 1.00        |             |        | 1.00        |             |        | 1.00        |             |        |
| Feb                       | 0.95        | (0.90-1.00) | 0.065  | 0.98        | (0.95-1.01) | 0.124  | 0.95        | (0.92-0.98) | <0.001 |
| Mar                       | 1.14        | (1.09-1.20) | <0.001 | 0.99        | (0.97-1.02) | 0.603  | 0.90        | (0.88-0.93) | <0.001 |
| Apr                       | 1.07        | (1.02-1.13) | 0.005  | 0.93        | (0.91-0.96) | <0.001 | 0.91        | (0.88-0.94) | <0.001 |
| May                       | 1.19        | (1.14-1.25) | <0.001 | 0.94        | (0.91-0.96) | <0.001 | 0.91        | (0.89-0.94) | <0.001 |
| Jun                       | 1.08        | (1.02-1.13) | 0.004  | 0.82        | (0.79-0.84) | <0.001 | 0.89        | (0.86-0.91) | <0.001 |
| Jul                       | 1.07        | (1.02-1.12) | 0.007  | 0.81        | (0.79-0.83) | <0.001 | 0.90        | (0.87-0.92) | <0.001 |
| Aug                       | 1.06        | (1.01-1.11) | 0.021  | 0.82        | (0.80-0.85) | <0.001 | 0.86        | (0.84-0.89) | <0.001 |
| Sep                       | 1.32        | (1.26-1.38) | <0.001 | 0.88        | (0.85-0.90) | <0.001 | 0.93        | (0.90-0.96) | <0.001 |
| Oct                       | 1.50        | (1.43-1.57) | <0.001 | 0.96        | (0.94-0.99) | 0.006  | 0.92        | (0.89-0.95) | <0.001 |
| Nov                       | 1.75        | (1.67-1.83) | <0.001 | 1.00        | (0.98-1.03) | 0.755  | 0.93        | (0.90-0.96) | <0.001 |
| Dec                       | 1.50        | (1.44-1.57) | <0.001 | 0.75        | (0.73-0.77) | <0.001 | 0.76        | (0.74-0.79) | <0.001 |
| <b>Depression</b>         |             |             |        |             |             |        |             |             |        |
| Jan                       | 1.00        |             |        | 1.00        |             |        | 1.00        |             |        |
| Feb                       | 0.92        | (0.89-0.95) | <0.001 | 0.95        | (0.93-0.98) | <0.001 | 0.95        | (0.92-0.97) | <0.001 |
| Mar                       | 0.97        | (0.93-1.00) | 0.038  | 0.94        | (0.92-0.97) | <0.001 | 0.90        | (0.87-0.92) | <0.001 |
| Apr                       | 0.85        | (0.82-0.88) | <0.001 | 0.85        | (0.83-0.87) | <0.001 | 0.90        | (0.87-0.92) | <0.001 |
| May                       | 0.92        | (0.89-0.95) | <0.001 | 0.90        | (0.88-0.92) | <0.001 | 0.91        | (0.88-0.93) | <0.001 |
| Jun                       | 0.84        | (0.81-0.87) | <0.001 | 0.76        | (0.74-0.79) | <0.001 | 0.88        | (0.85-0.91) | <0.001 |
| Jul                       | 0.75        | (0.72-0.78) | <0.001 | 0.75        | (0.73-0.77) | <0.001 | 0.89        | (0.86-0.91) | <0.001 |
| Aug                       | 0.64        | (0.62-0.67) | <0.001 | 0.73        | (0.71-0.75) | <0.001 | 0.85        | (0.83-0.88) | <0.001 |
| Sep                       | 0.98        | (0.95-1.02) | 0.365  | 0.82        | (0.80-0.84) | <0.001 | 0.93        | (0.90-0.95) | <0.001 |
| Oct                       | 1.11        | (1.08-1.15) | <0.001 | 0.89        | (0.87-0.91) | <0.001 | 0.92        | (0.89-0.94) | <0.001 |
| Nov                       | 1.29        | (1.25-1.33) | <0.001 | 0.93        | (0.91-0.96) | <0.001 | 0.94        | (0.91-0.97) | <0.001 |
| Dec                       | 0.99        | (0.96-1.02) | 0.431  | 0.72        | (0.70-0.74) | <0.001 | 0.77        | (0.75-0.79) | <0.001 |
| <b>Anxiety</b>            |             |             |        |             |             |        |             |             |        |
| Jan                       | 1.00        |             |        | 1.00        |             |        | 1.00        |             |        |
| Feb                       | 0.87        | (0.83-0.91) | <0.001 | 0.92        | (0.89-0.96) | <0.001 | 0.88        | (0.85-0.92) | <0.001 |
| Mar                       | 0.99        | (0.95-1.04) | 0.780  | 0.95        | (0.91-0.98) | 0.003  | 0.90        | (0.87-0.93) | <0.001 |
| Apr                       | 0.88        | (0.84-0.92) | <0.001 | 0.96        | (0.93-1.00) | 0.028  | 0.95        | (0.92-0.99) | 0.007  |
| May                       | 1.02        | (0.98-1.07) | 0.290  | 1.13        | (1.09-1.17) | <0.001 | 1.01        | (0.97-1.05) | 0.674  |
| Jun                       | 0.87        | (0.83-0.90) | <0.001 | 0.86        | (0.83-0.90) | <0.001 | 0.94        | (0.90-0.97) | <0.001 |
| Jul                       | 0.77        | (0.73-0.80) | <0.001 | 0.77        | (0.74-0.80) | <0.001 | 0.92        | (0.88-0.95) | <0.001 |
| Aug                       | 0.68        | (0.65-0.71) | <0.001 | 0.79        | (0.76-0.82) | <0.001 | 0.91        | (0.88-0.95) | <0.001 |
| Sep                       | 1.13        | (1.08-1.18) | <0.001 | 0.93        | (0.89-0.96) | <0.001 | 1.03        | (0.99-1.07) | 0.134  |
| Oct                       | 1.12        | (1.08-1.17) | <0.001 | 0.99        | (0.96-1.03) | 0.637  | 0.97        | (0.94-1.01) | 0.132  |
| Nov                       | 1.17        | (1.13-1.22) | <0.001 | 0.99        | (0.95-1.02) | 0.474  | 0.95        | (0.91-0.99) | 0.006  |
| Dec                       | 0.88        | (0.84-0.91) | <0.001 | 0.74        | (0.71-0.77) | <0.001 | 0.77        | (0.74-0.80) | <0.001 |
| <b>Self-harm</b>          |             |             |        |             |             |        |             |             |        |
| Jan                       | 1.00        |             |        | 1.00        |             |        | 1.00        |             |        |
| Feb                       | 0.92        | (0.87-0.98) | 0.006  | 0.99        | (0.92-1.07) | 0.834  | 0.86        | (0.77-0.96) | 0.006  |
| Mar                       | 0.99        | (0.94-1.05) | 0.848  | 1.03        | (0.96-1.11) | 0.433  | 0.92        | (0.83-1.02) | 0.096  |
| Apr                       | 0.93        | (0.88-0.99) | 0.013  | 0.95        | (0.88-1.02) | 0.176  | 0.98        | (0.89-1.09) | 0.733  |
| May                       | 1.00        | (0.95-1.06) | 0.912  | 0.98        | (0.91-1.05) | 0.560  | 1.02        | (0.92-1.13) | 0.667  |
| Jun                       | 0.93        | (0.88-0.98) | 0.009  | 0.95        | (0.88-1.02) | 0.155  | 1.01        | (0.91-1.12) | 0.814  |
| Jul                       | 0.75        | (0.71-0.79) | <0.001 | 0.85        | (0.79-0.92) | <0.001 | 0.97        | (0.88-1.08) | 0.599  |
| Aug                       | 0.56        | (0.52-0.59) | <0.001 | 0.89        | (0.83-0.96) | 0.003  | 0.97        | (0.88-1.07) | 0.547  |
| Sep                       | 0.80        | (0.76-0.85) | <0.001 | 0.83        | (0.76-0.89) | <0.001 | 0.87        | (0.78-0.96) | 0.007  |
| Oct                       | 0.87        | (0.82-0.92) | <0.001 | 0.87        | (0.81-0.94) | <0.001 | 0.89        | (0.80-0.99) | 0.025  |
| Nov                       | 0.97        | (0.92-1.03) | 0.352  | 0.82        | (0.76-0.89) | <0.001 | 0.80        | (0.72-0.89) | <0.001 |
| Dec                       | 0.78        | (0.73-0.82) | <0.001 | 0.82        | (0.76-0.88) | <0.001 | 0.94        | (0.85-1.04) | 0.226  |

Supplementary Table 2: Male incidence rate ratios, 95% confidence intervals (CI) and p values for SSRIs, depression, anxiety and self-harm adjusted for year, region, deprivation, ethnic group and working days, for each month, by age group, England, 2006-2019

|                           | 14-18 years |             |        | 19-23 years |             |        | 24-28 years |             |        |
|---------------------------|-------------|-------------|--------|-------------|-------------|--------|-------------|-------------|--------|
|                           | IRR         | (95% CI)    | p      | IRR         | (95% CI)    | p      | IRR         | (95% CI)    | p      |
| <b>SSRI prescriptions</b> |             |             |        |             |             |        |             |             |        |
| Jan                       | 1.00        |             |        | 1.00        |             |        | 1.00        |             |        |
| Feb                       | 0.99        | (0.92-1.07) | 0.805  | 0.97        | (0.94-1.01) | 0.097  | 0.94        | (0.90-0.98) | 0.002  |
| Mar                       | 1.14        | (1.06-1.23) | <0.001 | 0.98        | (0.95-1.01) | 0.251  | 0.91        | (0.88-0.95) | <0.001 |
| Apr                       | 1.16        | (1.08-1.25) | <0.001 | 0.91        | (0.88-0.95) | <0.001 | 0.88        | (0.85-0.92) | <0.001 |
| May                       | 1.19        | (1.11-1.28) | <0.001 | 0.96        | (0.93-0.99) | 0.022  | 0.92        | (0.89-0.96) | <0.001 |
| Jun                       | 1.10        | (1.02-1.19) | 0.010  | 0.85        | (0.82-0.88) | <0.001 | 0.92        | (0.89-0.96) | <0.001 |
| Jul                       | 1.04        | (0.97-1.12) | 0.274  | 0.83        | (0.80-0.86) | <0.001 | 0.89        | (0.86-0.93) | <0.001 |
| Aug                       | 1.06        | (0.98-1.14) | 0.122  | 0.82        | (0.79-0.85) | <0.001 | 0.87        | (0.83-0.90) | <0.001 |
| Sep                       | 1.36        | (1.27-1.46) | <0.001 | 0.90        | (0.87-0.93) | <0.001 | 0.90        | (0.87-0.94) | <0.001 |
| Oct                       | 1.51        | (1.41-1.62) | <0.001 | 0.93        | (0.90-0.96) | <0.001 | 0.91        | (0.87-0.94) | <0.001 |
| Nov                       | 1.72        | (1.61-1.84) | <0.001 | 1.01        | (0.98-1.05) | 0.552  | 0.94        | (0.90-0.97) | <0.001 |
| Dec                       | 1.57        | (1.47-1.68) | <0.001 | 0.83        | (0.80-0.86) | <0.001 | 0.82        | (0.79-0.85) | <0.001 |
| <b>Depression</b>         |             |             |        |             |             |        |             |             |        |
| Jan                       | 1.00        |             |        | 1.00        |             |        | 1.00        |             |        |
| Feb                       | 0.93        | (0.89-0.98) | 0.007  | 0.94        | (0.91-0.97) | <0.001 | 0.91        | (0.87-0.94) | <0.001 |
| Mar                       | 0.97        | (0.92-1.01) | 0.152  | 0.92        | (0.89-0.95) | <0.001 | 0.88        | (0.85-0.91) | <0.001 |
| Apr                       | 0.83        | (0.79-0.87) | <0.001 | 0.87        | (0.84-0.89) | <0.001 | 0.85        | (0.82-0.88) | <0.001 |
| May                       | 0.84        | (0.80-0.88) | <0.001 | 0.94        | (0.91-0.97) | <0.001 | 0.84        | (0.81-0.87) | <0.001 |
| Jun                       | 0.78        | (0.74-0.82) | <0.001 | 0.81        | (0.79-0.84) | <0.001 | 0.86        | (0.82-0.89) | <0.001 |
| Jul                       | 0.71        | (0.68-0.75) | <0.001 | 0.77        | (0.75-0.80) | <0.001 | 0.85        | (0.82-0.88) | <0.001 |
| Aug                       | 0.64        | (0.61-0.68) | <0.001 | 0.78        | (0.76-0.81) | <0.001 | 0.83        | (0.80-0.86) | <0.001 |
| Sep                       | 1.00        | (0.95-1.05) | 0.951  | 0.84        | (0.81-0.86) | <0.001 | 0.88        | (0.85-0.91) | <0.001 |
| Oct                       | 1.15        | (1.09-1.20) | <0.001 | 0.85        | (0.82-0.88) | <0.001 | 0.89        | (0.86-0.93) | <0.001 |
| Nov                       | 1.29        | (1.23-1.35) | <0.001 | 0.94        | (0.91-0.97) | <0.001 | 0.92        | (0.89-0.95) | <0.001 |
| Dec                       | 1.06        | (1.01-1.11) | 0.024  | 0.78        | (0.76-0.81) | <0.001 | 0.77        | (0.74-0.80) | <0.001 |
| <b>Anxiety</b>            |             |             |        |             |             |        |             |             |        |
| Jan                       | 1.00        |             |        | 1.00        |             |        | 1.00        |             |        |
| Feb                       | 0.90        | (0.84-0.97) | 0.003  | 0.92        | (0.88-0.97) | 0.001  | 0.96        | (0.91-1.01) | 0.159  |
| Mar                       | 0.96        | (0.90-1.02) | 0.185  | 0.90        | (0.86-0.95) | <0.001 | 0.94        | (0.90-0.99) | 0.026  |
| Apr                       | 0.84        | (0.78-0.90) | <0.001 | 0.94        | (0.90-0.99) | 0.013  | 0.97        | (0.92-1.02) | 0.277  |
| May                       | 0.95        | (0.89-1.02) | 0.144  | 1.06        | (1.01-1.11) | 0.023  | 1.02        | (0.97-1.07) | 0.546  |
| Jun                       | 0.86        | (0.80-0.92) | <0.001 | 0.85        | (0.81-0.90) | <0.001 | 0.95        | (0.90-1.00) | 0.041  |
| Jul                       | 0.77        | (0.71-0.82) | <0.001 | 0.79        | (0.75-0.83) | <0.001 | 0.91        | (0.86-0.96) | <0.001 |
| Aug                       | 0.70        | (0.66-0.76) | <0.001 | 0.79        | (0.75-0.83) | <0.001 | 0.90        | (0.85-0.95) | <0.001 |
| Sep                       | 1.19        | (1.12-1.27) | <0.001 | 0.91        | (0.87-0.96) | <0.001 | 0.97        | (0.92-1.02) | 0.198  |
| Oct                       | 1.06        | (0.99-1.13) | 0.085  | 0.90        | (0.86-0.95) | <0.001 | 0.94        | (0.90-0.99) | 0.026  |
| Nov                       | 1.14        | (1.07-1.21) | <0.001 | 0.91        | (0.86-0.95) | <0.001 | 0.92        | (0.87-0.97) | 0.001  |
| Dec                       | 0.86        | (0.80-0.92) | <0.001 | 0.77        | (0.73-0.81) | <0.001 | 0.84        | (0.79-0.88) | <0.001 |
| <b>Self-harm</b>          |             |             |        |             |             |        |             |             |        |
| Jan                       | 1.00        |             |        | 1.00        |             |        | 1.00        |             |        |
| Feb                       | 0.96        | (0.86-1.07) | 0.436  | 1.02        | (0.93-1.13) | 0.663  | 0.90        | (0.81-1.00) | 0.059  |
| Mar                       | 1.04        | (0.94-1.16) | 0.415  | 1.03        | (0.94-1.14) | 0.491  | 1.00        | (0.90-1.10) | 0.939  |
| Apr                       | 0.94        | (0.85-1.05) | 0.286  | 1.11        | (1.01-1.22) | 0.033  | 0.92        | (0.83-1.03) | 0.147  |
| May                       | 0.98        | (0.89-1.09) | 0.765  | 1.12        | (1.02-1.23) | 0.019  | 1.01        | (0.91-1.12) | 0.903  |
| Jun                       | 0.97        | (0.87-1.08) | 0.600  | 1.03        | (0.93-1.13) | 0.606  | 0.96        | (0.86-1.07) | 0.446  |
| Jul                       | 0.84        | (0.76-0.94) | 0.002  | 1.06        | (0.96-1.16) | 0.247  | 0.95        | (0.86-1.06) | 0.341  |
| Aug                       | 0.74        | (0.66-0.83) | <0.001 | 1.02        | (0.92-1.12) | 0.739  | 0.91        | (0.81-1.01) | 0.067  |
| Sep                       | 0.99        | (0.89-1.10) | 0.901  | 0.98        | (0.89-1.08) | 0.630  | 0.85        | (0.76-0.95) | 0.004  |
| Oct                       | 1.02        | (0.92-1.13) | 0.684  | 0.97        | (0.88-1.07) | 0.527  | 0.91        | (0.82-1.01) | 0.080  |
| Nov                       | 1.04        | (0.93-1.15) | 0.510  | 0.99        | (0.90-1.09) | 0.893  | 0.84        | (0.75-0.93) | 0.001  |
| Dec                       | 1.08        | (0.98-1.20) | 0.121  | 1.07        | (0.98-1.18) | 0.137  | 0.97        | (0.88-1.08) | 0.587  |
